# Supplementary material for: Temperature response of defect photoluminescence in locally functionalized single-walled carbon nanotubes
Source: Royal Society of Chemistry journal article supplement (doi:10.1039/d4ra08569h), 2025-01-01
Supplement: d4ra08569h1.pdf [file d4ra08569h1.pdf]

## Supporting Information

Temperature and Length-Dependent Defect Photoluminescence in Biocompatible Cross-Linked Polymer-Coated Locally Functionalized Single-Walled Carbon Nanotubes

Ryo Hamano<sup>1</sup>, Yoshiaki Niidome<sup>1</sup>, Naoki Tanaka<sup>1,2</sup>, Tomohiro Shiraki<sup>1,2</sup>, Tsuyohiko Fujigaya<sup>\*,1,2,3</sup>

<sup>1</sup> Department of Applied Chemistry, Graduate School of Engineering, Kyushu University, 744 Motoooka, Fukuoka 819-0395, Japan

<sup>2</sup> International Institute for Carbon Neutral Energy Research (WPI ICNER), Kyushu University, 744 Motoooka, Fukuoka 819-0395, Japan

<sup>3</sup> Center for Molecular Systems (CMS), Kyushu University, 744 Motoooka, Fukuoka 819-0395, Japan

**Table S1.** The estimated SWCNT concentration of length sorted gel-coated lf-SWCNTs-*p*NO<sub>2</sub> and gel-coated lf-SWCNTs-*o*P

| Sample                                         | SWCNT concentration [ nM] |       |       |       |       |
|------------------------------------------------|---------------------------|-------|-------|-------|-------|
|                                                | Unsorted (injection)      | fr1   | fr2   | fr3   | fr4   |
| Gel-coated lf-SWCNTs- <i>p</i> NO <sub>2</sub> | 5.65                      | 0.048 | 0.096 | 0.637 | 0.397 |
| Gel-coated lf-SWCNTs- <i>o</i> P               | 6.82                      | 0.086 | 0.193 | 0.133 | 0.071 |

**Table S2.** Calculated  $\Delta E_{\text{optical}}$ ,  $\Delta E_{\text{thermal}}$ , and  $\lambda$  values of  $E_{11}^*$  PL of unsorted and length sorted gel-coated lf-SWCNT-*o*P in H<sub>2</sub>O.

| Sample   | Average SWCNT length [nm] | $\Delta E_{\text{optical}}$ [meV] | $\Delta E_{\text{thermal}}$ [meV] | $\lambda$ [meV] |
|----------|---------------------------|-----------------------------------|-----------------------------------|-----------------|
| Unsorted | 231.9                     | 143                               | 51                                | 92              |
| Fr1      | 367.1                     | 139                               | 51                                | 88              |
| Fr2      | 245.1                     | 140                               | 50                                | 90              |
| Fr3      | 164.3                     | 143                               | 53                                | 90              |
| Fr4      | 117.6                     | 145                               | 20                                | 126             |

To calculate the integrated intensity, PL peaks were deconvoluted based on the Voigt function and the peak area was estimated using package Multi peak fitting in Igor Pro (ver. 6.36J).

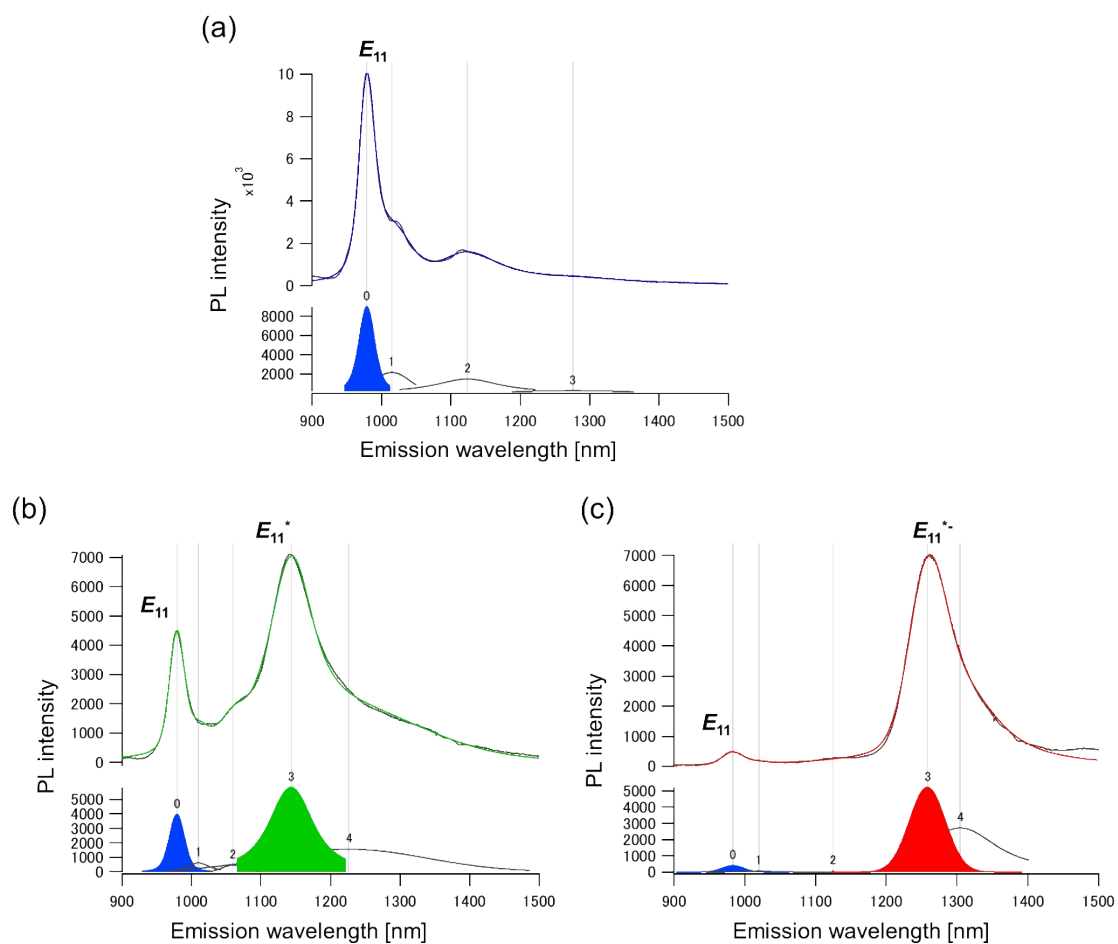

**Fig. S1** Deconvoluted PL spectra of (a) SDBS-dispersed SWCNTs, (b) SDBS-dispersed lf-SWCNTs- $pNO_2$ , and (c) SDS-dispersed lf-SWCNTs- $oP$  in  $D_2O$ .

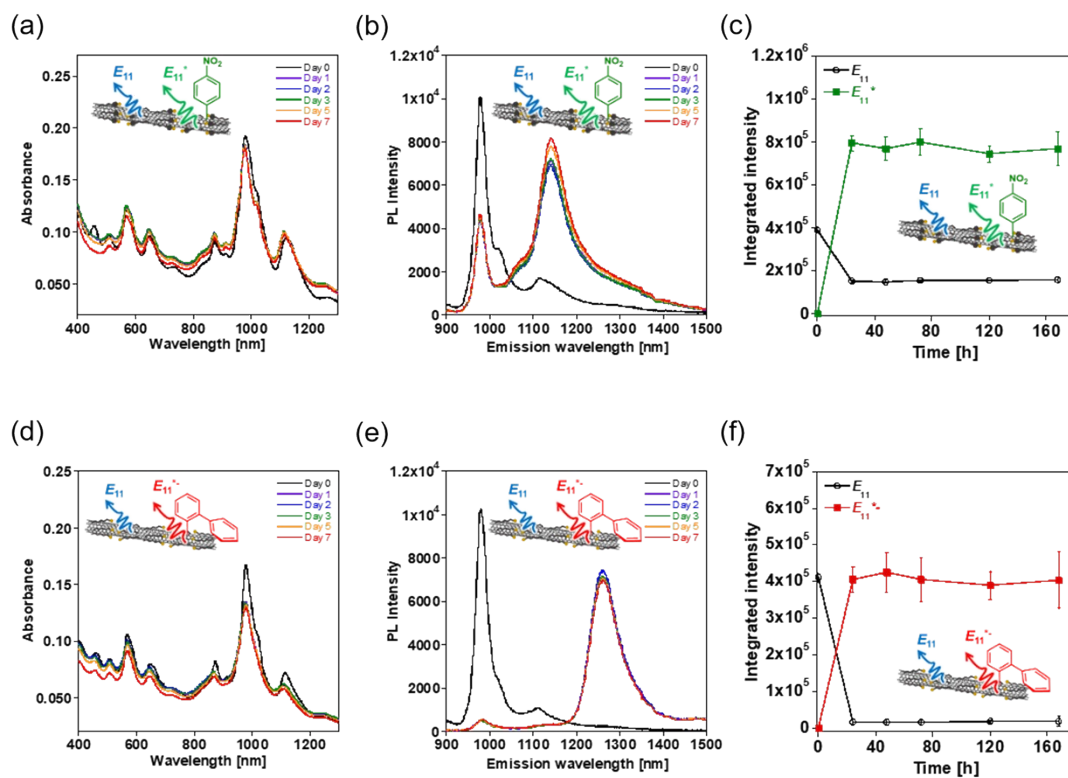

**Fig. S2** Time course (a) absorption spectra, (b) PL spectra (excitation: 570 nm) and (c) integrated  $E_{11}$  and  $E_{11}^*$  PL intensity of SDBS-dispersed l1-SWCNTs-*p*NO<sub>2</sub> in D<sub>2</sub>O monitoring for 7 days. The final concentration of Dz-*p*NO<sub>2</sub> [Dz-*p*NO<sub>2</sub>] was 25.6 μM. Time course (d) absorption spectra, (e) PL spectra (excitation: 570 nm) and (f) integrated  $E_{11}$  and  $E_{11}^*$  PL intensity of SDS-dispersed l1-SWCNTs-*o*P in D<sub>2</sub>O. The final concentration of Dz-*o*P [Dz-*o*P] was 6.4 μM. The spectra before the addition of the diazonium salts were also displayed as Day 0 (black line). Error bars mean the error estimated during peak deconvolution.

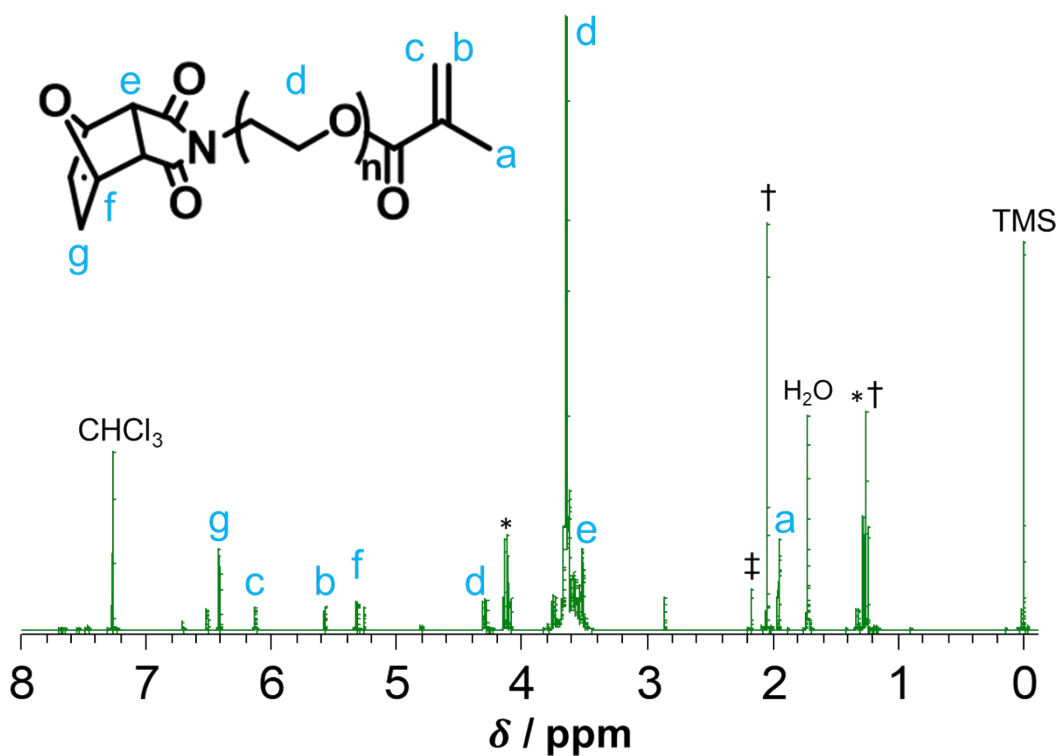

**Fig. S3** <sup>1</sup>H NMR spectra of *endo*-FpMMA. Peaks indicated as \*, † and ‡ can be assigned to the peaks of solvents (diethyl acetate, ethyl acetate and toluene, respectively) used for starting material and column purification.

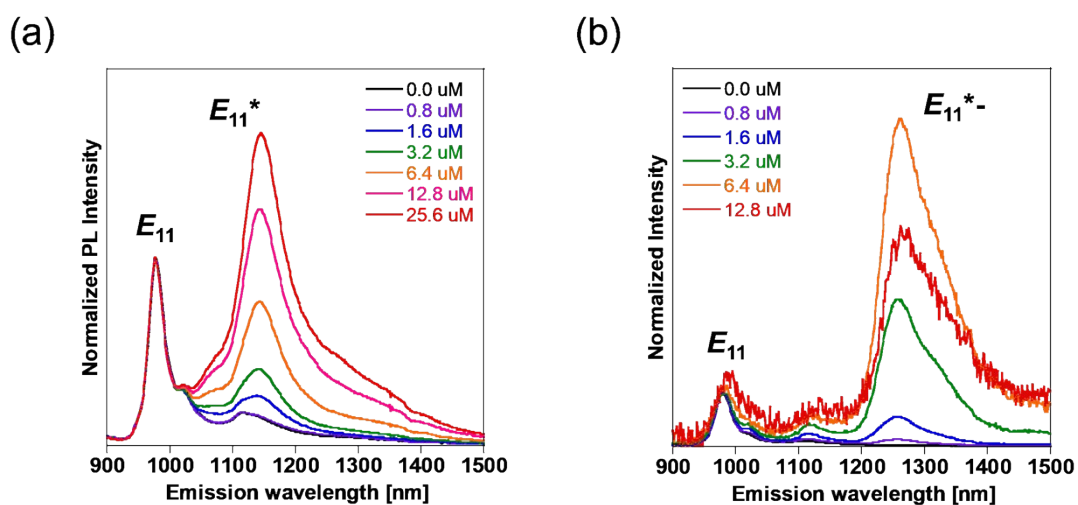

**Fig. S4** Normalized PL spectra (excitation: 570 nm) of (a) lf-SWCNTs-*p*NO<sub>2</sub> in SDBS solution and (b) lf-SWCNTs-*o*P in SDS solution react with different [Dz-*p*NO<sub>2</sub>] and [Dz-*o*P], respectively.

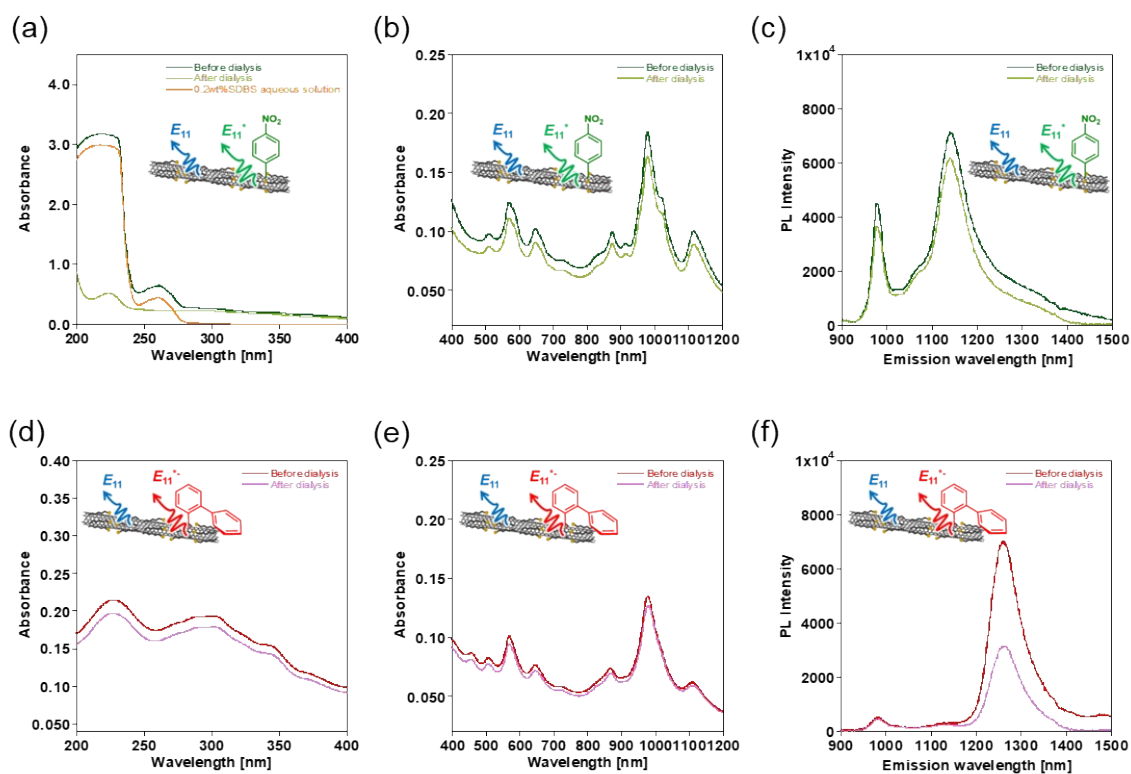

**Fig. S5** (a, b) The absorption and (c) PL spectra (excitation: 570 nm) of 1f-SWCNTs-*p*NO<sub>2</sub> before (green) and after (light green) dialysis. The absorption spectrum of the aqueous SDBS solution was also displayed as reference (orange). (d, e) The absorption and (f) PL spectra (excitation: 570 nm) of 1f-SWCNTs-*o*P before (red) and after (pink) dialysis.

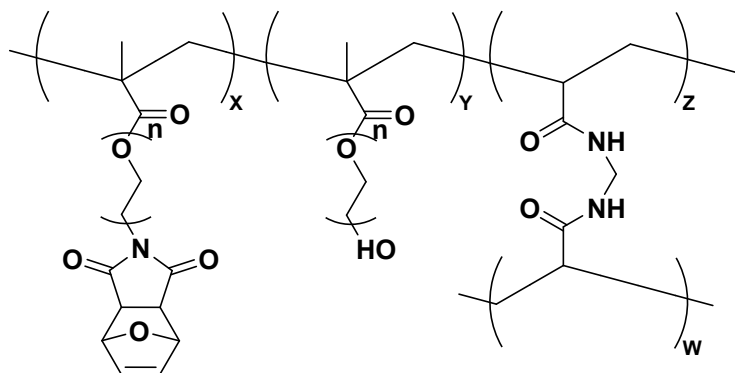

**Fig S6.** Chemical structure of the gel in *endo*-FpM/PEG.

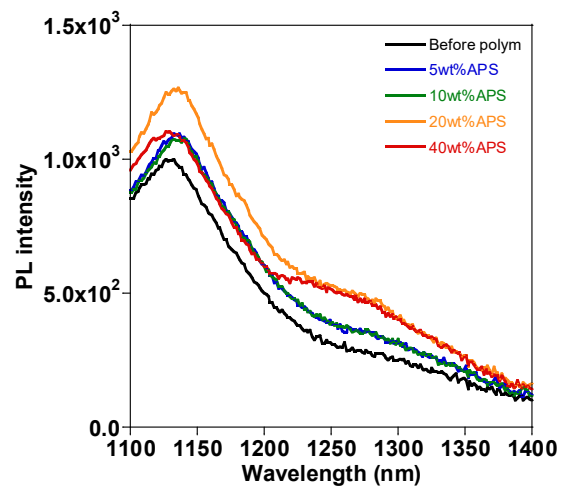

**Fig. S7** PL spectra (excitation: 570 nm) of SDS-dispersed SWCNT after CNT micelle polymerization using different concentration of APS, where PEGAM and *endo*-FpMMA were used as monomer.

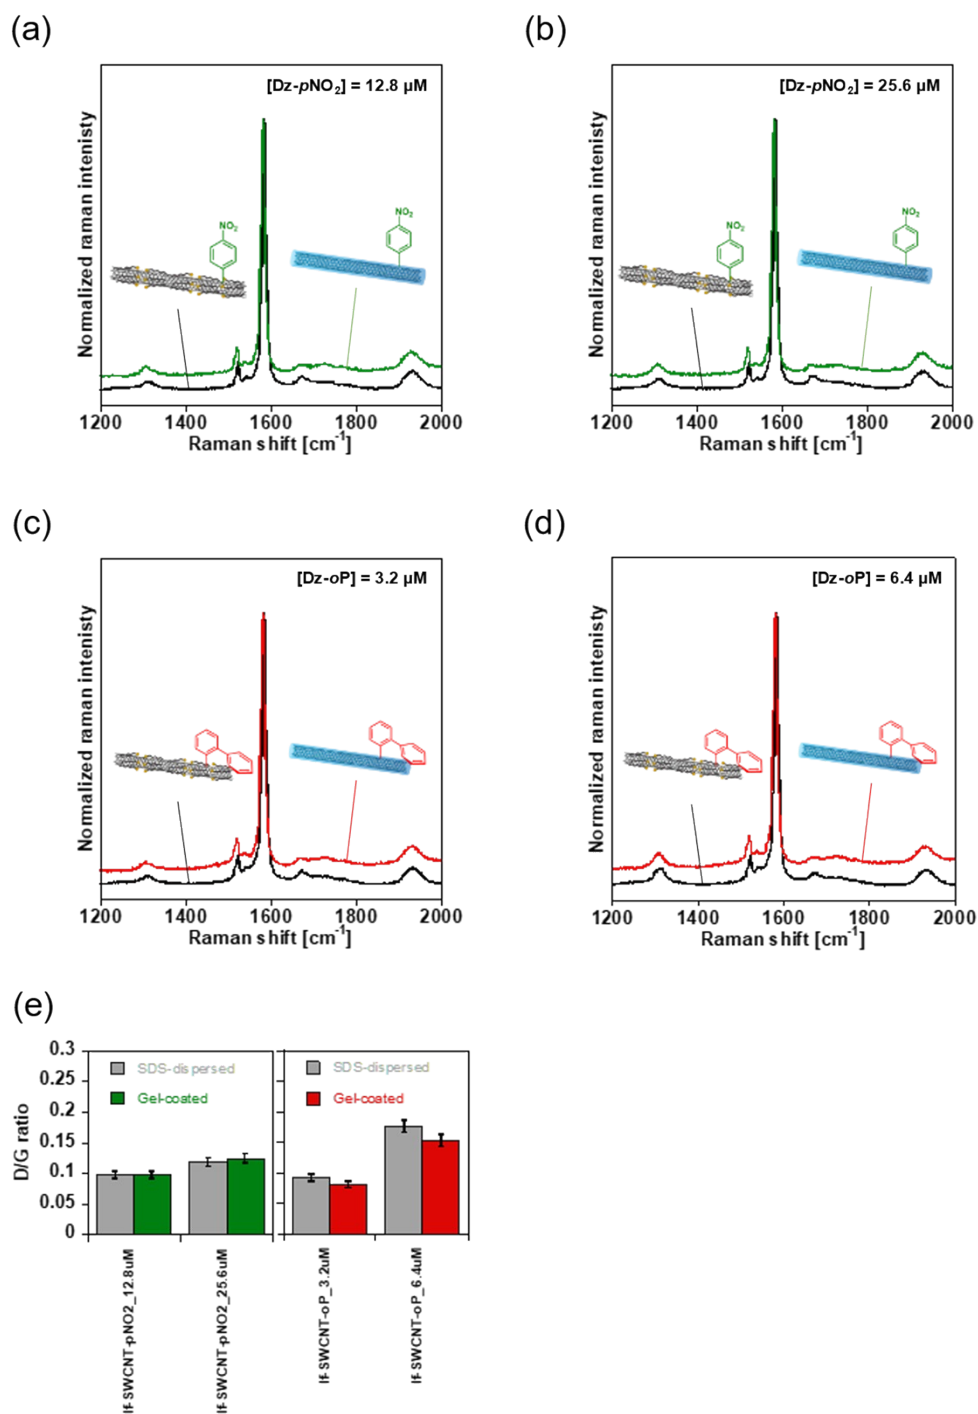

**Fig. S8** Normalized Raman spectra of (a, b) If-SWCNTs-*p*NO<sub>2</sub> and (c, d) If-SWCNTs-*o*P before (black) and after CNT micelle polymerization. (e) D/G ratio of If-SWCNTs-*p*NO<sub>2</sub> (left panel) and If-SWCNTs-*o*P (right panel) before and after the polymerization. Error bars mean the error estimated during peak deconvolution.

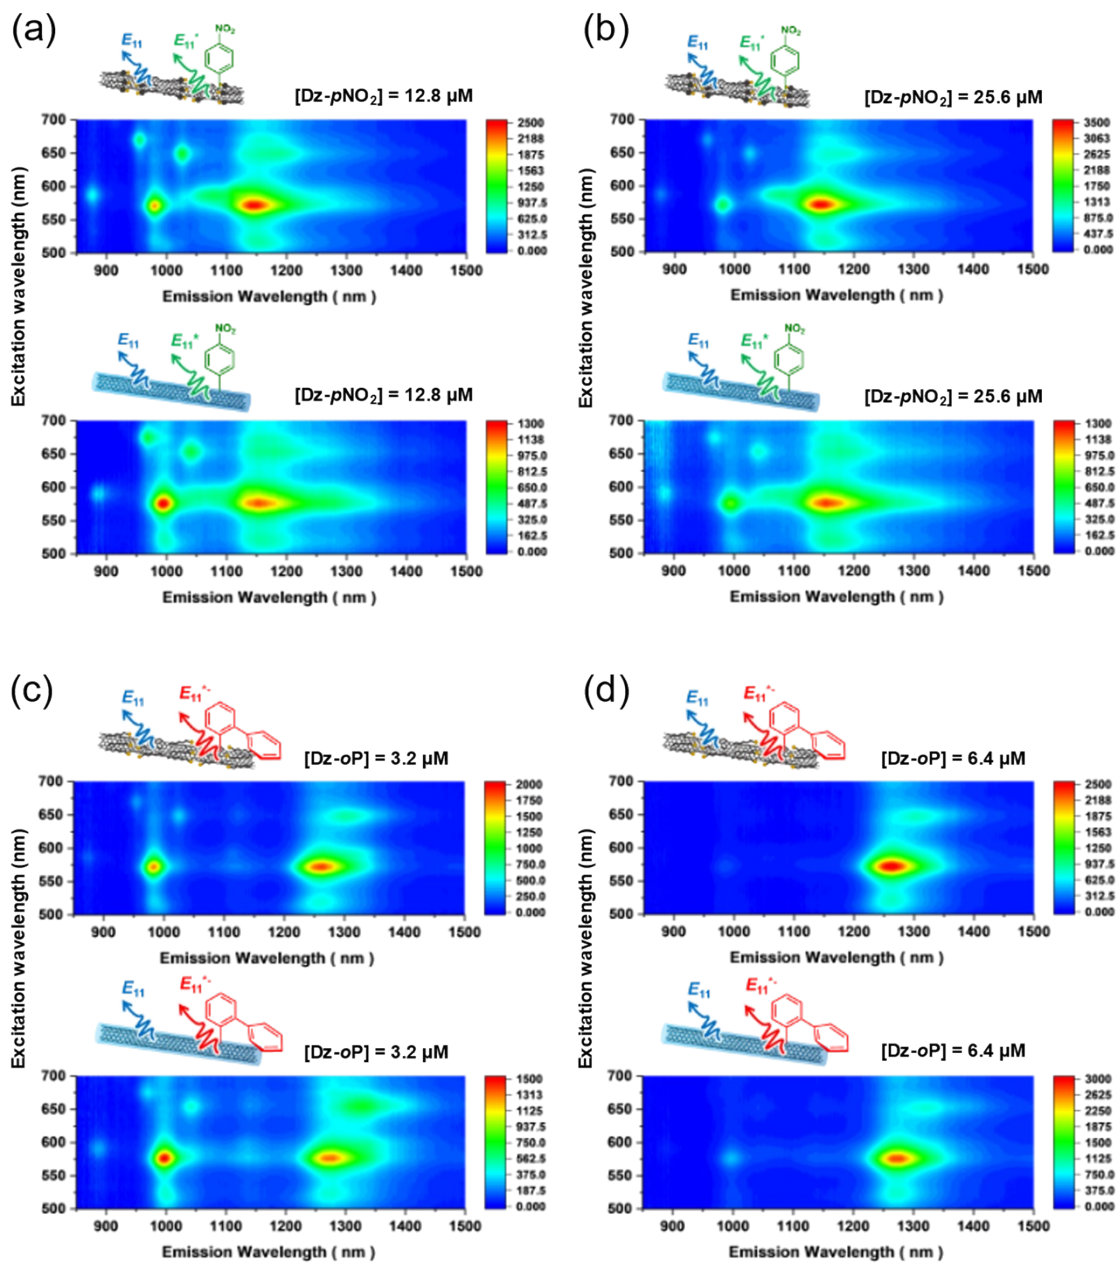

**Fig. S9** PL contour plot of (a) If-SWCNTs-*p*NO<sub>2</sub> prepared with [Dz-*p*NO<sub>2</sub>] = 12.8 μM, (b) If-SWCNTs-*p*NO<sub>2</sub> prepared with [Dz-*p*NO<sub>2</sub>] = 25.6 μM, (c) If-SWCNTs-*o*P prepared with [Dz-*o*P] = 3.2 μM and (d) If-SWCNTs-*o*P prepared with [Dz-*o*P] = 6.4 μM before (upper panels) and after (lower panels) CNT micelle polymerization. Measurements were performed in D<sub>2</sub>O.



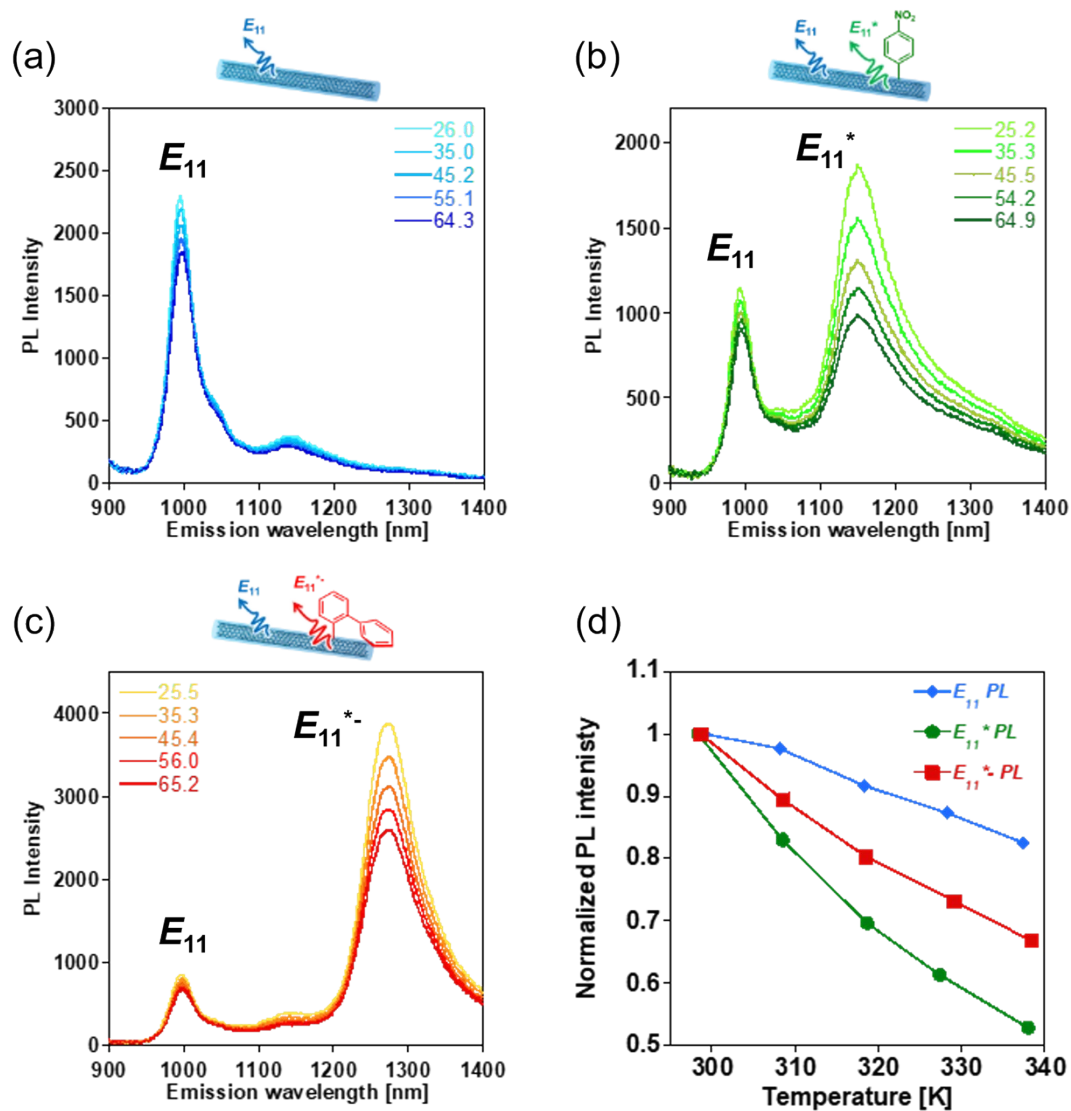

**Fig. S10** PL spectra (excitation: 570 nm) of (a) gel-coated SWCNTs, (b) gel-coated lf-SWCNTs- $pNO_2$  and (c) gel-coated lf-SWCNTs- $oP$  measured at different temperature. (d) Plots of normalized PL intensity at different temperature of  $E_{11}$  PL of gel-coated SWCNTs (blue),  $E_{11}^*$  PL of gel-coated lf-SWCNTs- $pNO_2$  (green) and  $E_{11}^{*-}$  PL of gel-coated lf-SWCNTs- $oP$  (red).

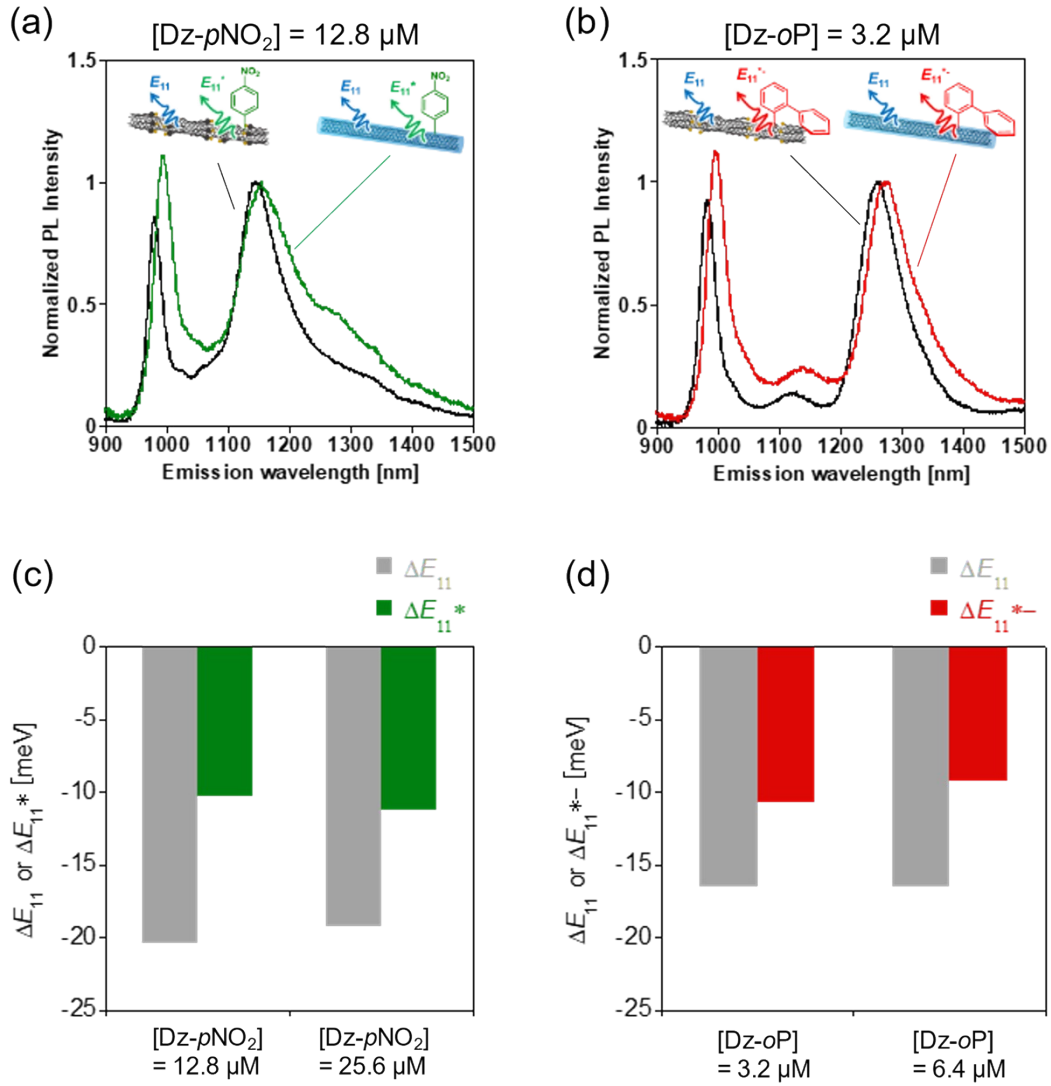

**Fig. S11** (a) PL spectra (excitation: 570 nm) of SDBS-dispersed lF-SWCNT-pNO<sub>2</sub> in (black) and gel-coated lF-SWCNT-pNO<sub>2</sub> (green), both of which were prepared with [Dz-pNO<sub>2</sub>] = 12.8 μM in D<sub>2</sub>O. (b) PL spectra (excitation: 570 nm) of SDS-dispersed lF-SWCNT-oP (black) and gel-coated lF-SWCNT-oP, both of which were prepared with [Dz-oP] = 3.2 μM in D<sub>2</sub>O. (c) Energy shift values of E<sub>11</sub> and E<sub>11</sub>\* PL after gel coating of lF-SWCNTs-pNO<sub>2</sub> synthesized at different [Dz-pNO<sub>2</sub>]. (d) Energy shift values of E<sub>11</sub> and E<sub>11</sub>\* PL due to gel coating of lF-SWCNTs-oP synthesized at different [Dz-oP].

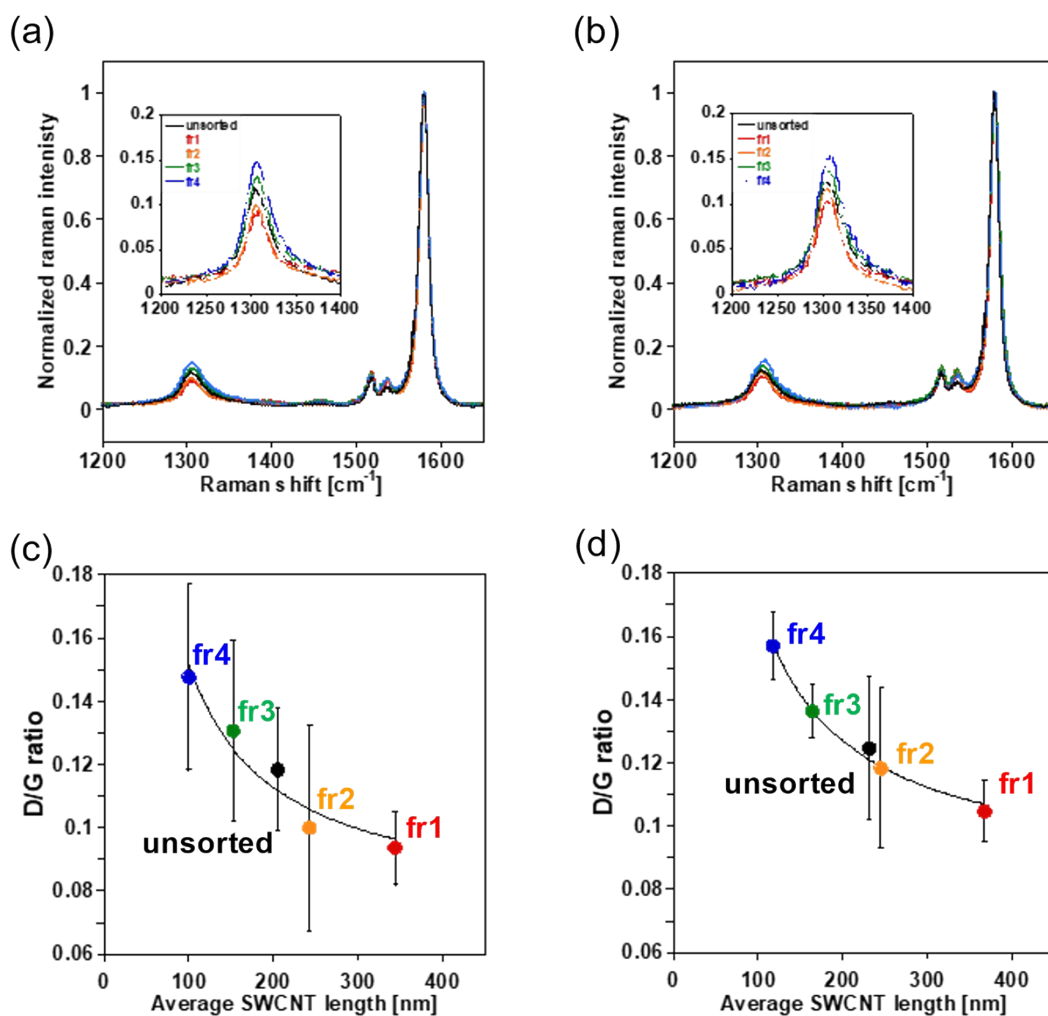

**Fig. S12** (a, b) Raman spectra and (c, d) D/G ratio of unsorted and length sorted gel-coated lF-SWCNTs-pNO<sub>2</sub> (a, c) and gel-coated lF-SWCNTs-oP (b, d). The D/G ratio was fitted as a function of the inverse of the average SWCNT length ( $\sim 1/L$ ). Error bars mean standard deviation calculated from five different measurement points.

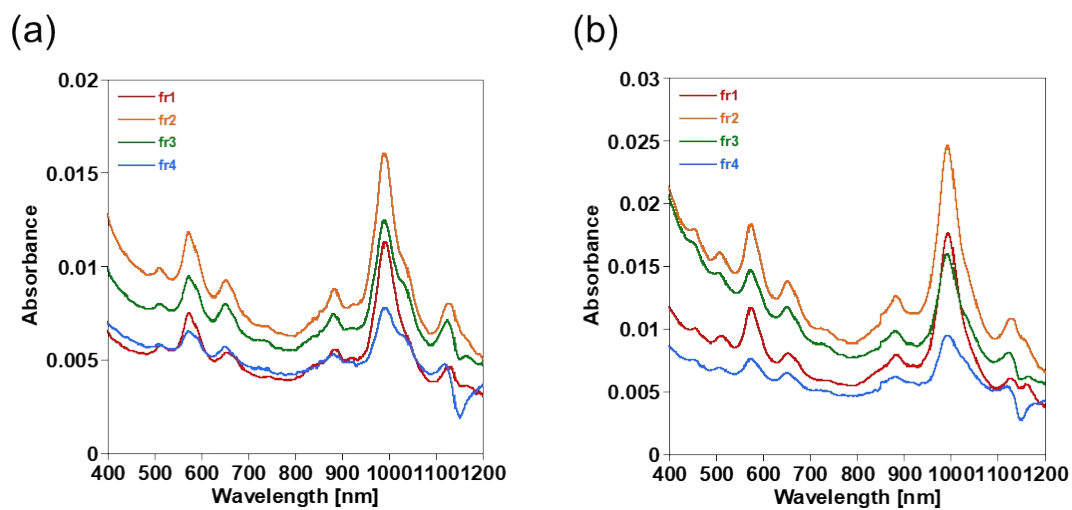

**Fig. S13** Absorption spectra of fr1 (red), fr2 (orange), fr3 (green) and fr4 (blue) of (a) gel-coated lf-SWCNTs-*p*NO<sub>2</sub> and (b) gel-coated lf-SWCNTs-*o*P.

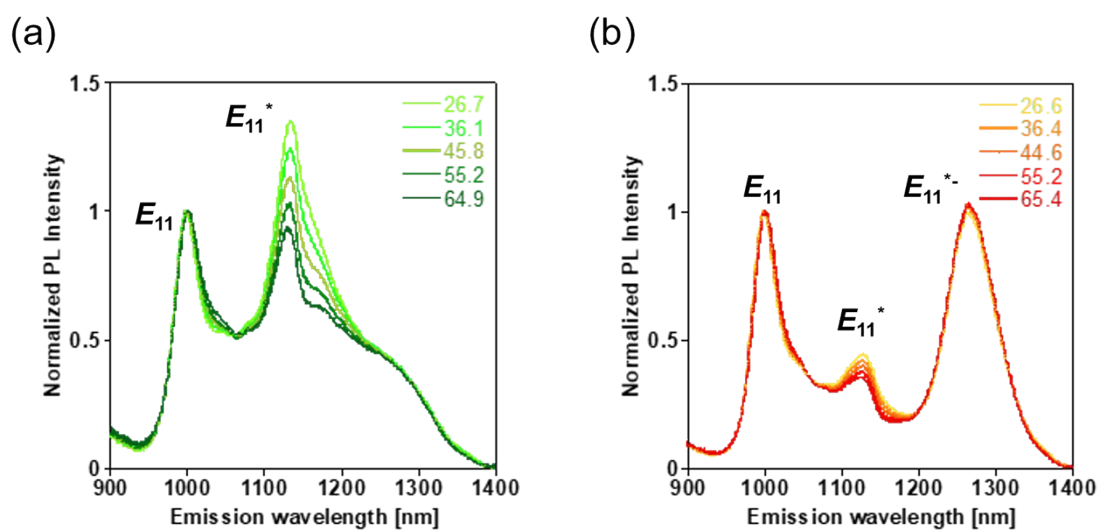

**Fig. S14** PL spectra (excitation: 570 nm) of unsorted (a) gel-coated lf-SWCNTs-*p*NO<sub>2</sub> and (b) gel-coated lf-SWCNTs-*o*P in H<sub>2</sub>O measured at different temperature.

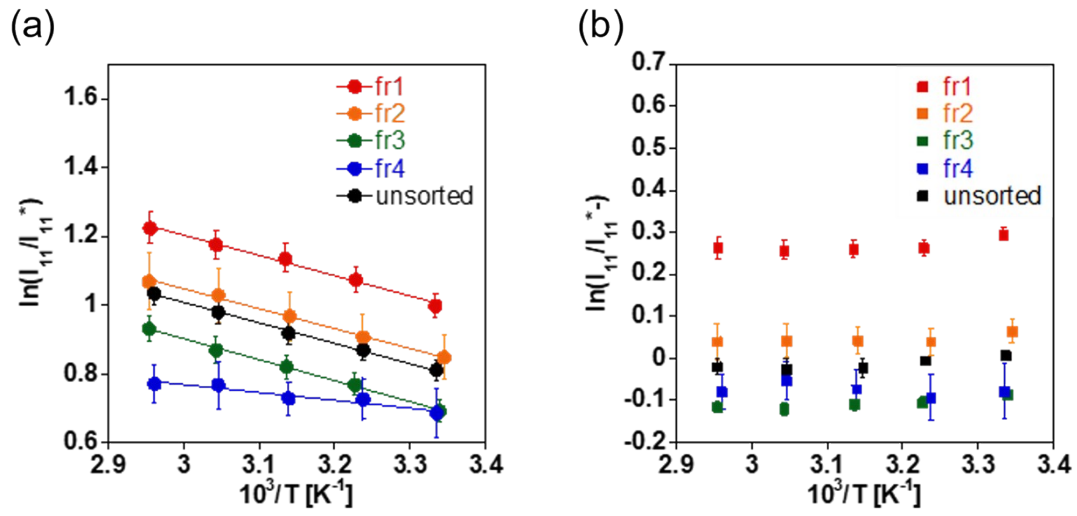

**Fig. S15** The Van't Hoff plot of unsorted and length sorted gel-coated If-SWCNTs-oP  $E_{11}^*$  PL (a) and  $E_{11}^*$  PL (b) in  $H_2O$ . Error bars mean the error estimated during peak deconvolution.
